# Supplementary material
Source: PubMed Central journal article supplement (PMC5967671)
Supplement: CJN.07400717SupplementaryData.pdf [file CJN.07400717SupplementaryData.pdf]

*Supplemental material is neither peer-reviewed nor thoroughly edited by CJASN. The authors alone are responsible for the accuracy and presentation of the material.*

## **Supplemental Material**

### **Serum Sodium and Impaired Cognition in Older Community-Dwelling Men**

Kristen L Nowak, PhD, MPH , Kristine Yaffe, MD, Eric S Orwoll, MD, Joachim H Ix, MD, MAS, Zhiying You, PhD, Elizabeth Barrett-Connor, MD, Andrew R Hoffman, MD <sup>7</sup>, Michel Chonchol, MD

## **Summary of Supplemental Material**

**Supplemental Table 1.** Associations ( $\beta$ -estimates; 95% CI) between tertiles of serum sodium levels and 3MS score at baseline (cross-sectional analysis).

**Supplemental Table 2.** Associations ( $\beta$ -estimates; 95% CI) between tertiles of serum sodium levels and Trails B time at baseline (cross-sectional analysis).

**Supplemental Table 3.** Associations ( $\beta$ -estimates; 95% CI) between tertiles of serum sodium levels and change in 3MS score at follow-up (longitudinal analysis).

**Supplemental Table 4.** Associations ( $\beta$ -estimates; 95% CI) between tertiles of serum sodium levels and change in Trails B time at follow-up (longitudinal analysis).

**Supplemental Table 5.** Associations (odds ratio; 95% CI) between clinical cut-offs of serum sodium levels and prevalent cognitive impairment (cross-sectional analysis).

**Supplemental Table 6.** Associations (odds ratio; 95% CI) between clinical cut-offs of serum sodium levels and cognitive decline (longitudinal analysis).

**Supplemental Table 7.** Associations (odds ratio; 95% CI) between quartiles of serum sodium levels and prevalent cognitive impairment (cross-sectional analysis).

**Supplemental Table 8.** Associations (odds ratio; 95% CI) between quartiles of serum sodium levels and cognitive decline (longitudinal analysis).

**Supplemental Table 9.** Associations (odds ratio; 95% CI) between categories of serum sodium levels (<136, 136-138, 139-140, 141-142, 143-144, and  $\geq$ 145 mmol/L) and prevalent cognitive impairment (cross-sectional analysis).

**Supplemental Table 10.** Associations (odds ratio; 95% CI) between categories of serum sodium levels (<136, 136-138, 139-140, 141-142, 143-144, and  $\geq$ 145 mmol/L) and cognitive decline (longitudinal analysis).

**Supplemental Table 11.** Associations (odds ratio; 95% CI) between tertiles of serum sodium levels and prevalent cognitive impairment, excluding individuals with serum sodium level <136 mmol/L (cross-sectional analysis)

**Supplemental Table 12.** Associations (odds ratio; 95% CI) between tertiles of serum sodium levels and cognitive decline, excluding individuals with serum sodium level <136 mmol/L (longitudinal analysis)

**Supplemental Table 1.** Associations ( $\beta$ -estimates; 95% CI) between tertiles of serum sodium levels and 3MS score at baseline (cross-sectional analysis)

| Variable          | Tertile 1<br>(126-140<br>mmol/L)<br>(n=1814) | Tertile 2<br>(141-142<br>mmol/L)<br>(n=1818) | Tertile 3<br>(143-153<br>mmol/L)<br>(n=1803) | Continuous<br>(per 5 mmol/L<br>lower serum<br>sodium) |
|-------------------|----------------------------------------------|----------------------------------------------|----------------------------------------------|-------------------------------------------------------|
| <b>Unadjusted</b> | 6.13<br>[-3.56, 15.84]                       | Ref                                          | 5.47<br>[-3.59, 15.20]                       | -0.49<br>[-8.21, 7.23]                                |
| <b>Model 1</b>    | 5.51<br>[-3.04, 14.07]                       | Ref                                          | 4.28<br>[-4.29, 12.85]                       | 0.63<br>[-6.18, 7.44]                                 |
| <b>Model 2</b>    | 5.63<br>[-2.92, 14.18]                       | Ref                                          | 3.91<br>[-4.61, 12.43]                       | 1.26<br>[-5.56, 8.08]                                 |
| <b>Model 3</b>    | 5.41<br>[-3.11, 13.94]                       | Ref                                          | 3.46<br>[-5.04, 11.96]                       | 1.54<br>[-5.26, 8.34]                                 |
| <b>Model 4</b>    | 4.14<br>[-4.50, 12.78]                       | Ref                                          | 2.88<br>[-5.72, 11.48]                       | 0.48<br>[-6.42, 7.39]                                 |

3MS score, modified mini-mental examination score. 3MS score was transformed in analyses as:  $\log(\sqrt{110-3\text{MS score}})$ . All values are  $\times 10^{-3}$ . Model 1: adjusted for age, race/ethnicity, and education. Model 2: adjusted for model 1, smoking, alcohol, body-mass index, and physical activity. Model 3: Model 2 + estimated glomerular filtration rate (Chronic Kidney Disease Epidemiology Collaboration equation), and history of cardiovascular disease, diabetes, hypertension, stroke and chronic obstructive pulmonary disease. Model 4: model 3 + quality of life measures and serum glucose level. Serum glucose level is missing in n=141.

**Supplemental Table 2.** Associations ( $\beta$ -estimates; 95% CI) between tertiles of serum sodium levels and Trails B time at baseline (cross-sectional analysis)

| Variable          | Tertile 1<br>(126-140<br>mmol/L)<br><br>(n=1814) | Tertile 2<br>(141-142<br>mmol/L)<br><br>(n=1818) | Tertile 3<br>(143-153<br>mmol/L)<br><br>(n=1803) | Continuous<br>(per 5 mmol/L<br>lower serum<br>sodium) |
|-------------------|--------------------------------------------------|--------------------------------------------------|--------------------------------------------------|-------------------------------------------------------|
| <b>Unadjusted</b> | 3.47<br>[0.82, 6.12]                             | Ref                                              | 1.16<br>[-1.49, 3.82]                            | 3.13<br>[1.02, 5.24]                                  |
| <b>Model 1</b>    | 3.29<br>[0.90, 5.68]                             | Ref                                              | 1.14<br>[-1.25, 3.53]                            | 2.81<br>[0.91, 4.71]                                  |
| <b>Model 2</b>    | 2.93<br>[0.56, 5.30]                             | Ref                                              | 1.06<br>[-1.31, 3.43]                            | 2.68<br>[0.78, 4.57]                                  |
| <b>Model 3</b>    | 2.83<br>[0.47, 5.18]                             | Ref                                              | 0.90<br>[-1.45, 3.26]                            | 2.75<br>[0.86, 4.63]                                  |
| <b>Model 4</b>    | 2.83<br>[0.44, 5.23]                             | Ref                                              | 1.05<br>[-1.33, 3.44]                            | 2.61<br>[0.69, 4.52]                                  |

Trails B time, Trail Making Test part B time. Trails B time was transformed in analyses as  $\log(\text{Trails B time})$ . All values are  $\times 10^{-2}$ . Model 1: adjusted for age, race/ethnicity, and education. Model 2: adjusted for model 1, smoking, alcohol intake, body-mass index category, and physical activity. Model 3: Model 2 + estimated glomerular filtration rate (Chronic Kidney Disease Epidemiology Collaboration equation), and history of cardiovascular disease, diabetes, hypertension, stroke and chronic obstructive pulmonary disease. Model 4: model 3 + quality of life measures and serum glucose level. Serum glucose level is missing in n=141.

**Supplemental Table 3.** Associations ( $\beta$ -estimates; 95% CI) between tertiles of serum sodium levels and change in 3MS score at follow-up (longitudinal analysis)

| Variable          | Tertile 1<br>(126-140<br>mmol/L)<br>(n=1175) | Tertile 2<br>(141-142<br>mmol/L)<br>(n=1214) | Tertile 3<br>(143-153<br>mmol/L)<br>(n=1222) | Continuous<br>(per 5<br>mmol/L<br>lower serum<br>sodium) |
|-------------------|----------------------------------------------|----------------------------------------------|----------------------------------------------|----------------------------------------------------------|
| <b>Unadjusted</b> | -0.17<br>[-0.65, 0.32]                       | Ref                                          | 0.07<br>[-0.41, 0.55]                        | -0.06<br>[-0.37, 0.25]                                   |
| <b>Model 1</b>    | -0.16<br>[-0.64, 0.32]                       | Ref                                          | 0.07<br>[-0.41, 0.54]                        | -0.02<br>[-0.32, 0.28]                                   |
| <b>Model 2</b>    | -0.15<br>[-0.63, 0.33]                       | Ref                                          | 0.06<br>[-0.41, 0.54]                        | 0.02<br>[-0.29, 0.32]                                    |
| <b>Model 3</b>    | -0.12<br>[-0.59, 0.36]                       | Ref                                          | 0.05<br>[-0.43, 0.52]                        | 0.06<br>[-0.24, 0.37]                                    |
| <b>Model 4</b>    | -0.16<br>[-0.64, 0.32]                       | Ref                                          | -0.02<br>[-0.50, 0.45]                       | 0.09<br>[-0.22, 0.40]                                    |

3MS score, modified mini-mental examination score. Model 1: adjusted for age, race/ethnicity, and education. Model 2: adjusted for model 1, smoking, alcohol intake, body-mass index category, and physical activity. Model 3: Model 2 + estimated glomerular filtration rate (Chronic Kidney Disease Epidemiology Collaboration equation), and history of cardiovascular disease, diabetes, hypertension, stroke and chronic obstructive pulmonary disease. Model 4: model 3 + quality of life measures and serum glucose level. Serum glucose level is missing in n=81.

**Supplemental Table 4.** Associations ( $\beta$ -estimates; 95% CI) between tertiles of serum sodium levels and change in Trails B time at follow-up (longitudinal analysis)

| Variable          | Tertile 1<br>(126-140<br>mmol/L)<br>(n=1175) | Tertile 2<br>(141-142<br>mmol/L)<br>(n=1214) | Tertile 3<br>(143-153<br>mmol/L)<br>(n=1222) | Continuous<br>(per 5<br>mmol/L<br>lower serum<br>sodium) |
|-------------------|----------------------------------------------|----------------------------------------------|----------------------------------------------|----------------------------------------------------------|
| <b>Unadjusted</b> | -0.93<br>[-4.52, 2.66]                       | Ref                                          | -0.72<br>[-4.52, 2.66]                       | -0.88<br>[-3.78, 2.03]                                   |
| <b>Model 1</b>    | -0.91<br>[-4.48, 2.66]                       | Ref                                          | -0.75<br>[-4.29, 2.79]                       | -0.91<br>[-3.80, 1.98]                                   |
| <b>Model 2</b>    | -0.77<br>[-4.35, 2.81]                       | Ref                                          | -0.64<br>[-4.18, 2.90]                       | -0.91<br>[-3.81, 1.99]                                   |
| <b>Model 3</b>    | -0.97<br>[-4.56, 2.61]                       | Ref                                          | -0.60<br>[-4.14, 2.95]                       | -1.12<br>[-4.03, 1.79]                                   |
| <b>Model 4</b>    | -0.88<br>[-4.51, 2.75]                       | Ref                                          | -0.17<br>[-3.76, 3.42]                       | -1.37<br>[-4.32, 1.59]                                   |

Trails B score, Trail Making Test part B score. Model 1: adjusted for age, race/ethnicity, and education. Model 2: adjusted for model 1, smoking, alcohol intake, body-mass index category, and physical activity. Model 3: Model 2 + estimated glomerular filtration rate (Chronic Kidney Disease Epidemiology Collaboration equation), and history of cardiovascular disease, diabetes, hypertension, stroke and chronic obstructive pulmonary disease. Model 4: model 3 + quality of life measures and serum glucose level. Serum glucose level is missing in n=81.

**Supplemental Table 5.** Associations (odds ratio; 95% CI) between clinical cut-offs of serum sodium levels and prevalent cognitive impairment (cross-sectional analysis)

| <b>Model</b>      | <b>Hyponatremia</b><br>(<136 mmol/L)<br>(n=100) | <b>Normonatremia</b><br>(136-145<br>mmol/L)<br>(n=5120) | <b>Hypernatremia</b><br>(>145 mmol/L)<br>(n=215) | <b>Continuous</b><br>(per 5 unit<br>lower serum<br>sodium) |
|-------------------|-------------------------------------------------|---------------------------------------------------------|--------------------------------------------------|------------------------------------------------------------|
| <b>Unadjusted</b> | 1.95 [1.22, 3.13]                               | Ref                                                     | 1.40 [0.97, 2.01]                                | 1.19 [1.02, 1.37]                                          |
| <b>Model 1</b>    | 2.30 [1.39, 3.82]                               | Ref                                                     | 1.35 [0.91, 2.00]                                | 1.24 [1.06, 1.45]                                          |
| <b>Model 2</b>    | 2.42 [1.45, 4.03]                               | Ref                                                     | 1.37 [0.93, 2.03]                                | 1.25 [1.07, 1.47]                                          |
| <b>Model 3</b>    | 2.38 [1.42, 3.98]                               | Ref                                                     | 1.39 [0.94, 2.06]                                | 1.24 [1.05, 1.45]                                          |
| <b>Model 4</b>    | 2.35 [1.39, 3.97]                               | Ref                                                     | 1.40 [0.94, 2.08]                                | 1.24 [1.05, 1.46]                                          |

Model 1: adjusted for age, race/ethnicity, and education. Model 2: adjusted for model 1, smoking, alcohol intake, body-mass index category, and physical activity. Model 3: Model 2 + estimated glomerular filtration rate (Chronic Kidney Disease Epidemiology Collaboration equation), and history of cardiovascular disease, diabetes, hypertension, stroke and chronic obstructive pulmonary disease. Model 4: model 3 + quality of life measures and serum glucose level. Serum glucose level is missing in n=141.

**Supplemental Table 6.** Associations (odds ratio; 95% CI) between clinical cut-offs of serum sodium levels and cognitive decline (longitudinal analysis)

| <b>Model</b>      | <b>Hyponatremia</b><br>(<136 mmol/L)<br>(n=52) | <b>Normonatremia</b><br>(136-145 mmol/L)<br>(n=3417) | <b>Hypernatremia</b><br>(>145 mmol/L)<br>(n=142) | <b>Continuous</b><br>(per 5 unit lower serum sodium) |
|-------------------|------------------------------------------------|------------------------------------------------------|--------------------------------------------------|------------------------------------------------------|
| <b>Unadjusted</b> | 0.77 [0.30, 1.94]                              | Ref                                                  | 1.32 [0.83, 2.11]                                | 1.01 [0.83, 1.24]                                    |
| <b>Model 1</b>    | 0.73 [0.28, 1.87]                              | Ref                                                  | 1.34 [0.83, 2.15]                                | 0.99 [0.81, 1.22]                                    |
| <b>Model 2</b>    | 0.73 [0.28, 1.89]                              | Ref                                                  | 1.32 [0.82, 2.12]                                | 1.00 [0.82, 1.22]                                    |
| <b>Model 3</b>    | 0.74 [0.28, 1.91]                              | Ref                                                  | 1.33 [0.82, 2.14]                                | 0.99 [0.81, 1.21]                                    |
| <b>Model 4</b>    | 0.74 [0.29, 1.92]                              | Ref                                                  | 1.39 [0.86, 2.25]                                | 0.97 [0.79, 1.19]                                    |

Model 1: adjusted for age, race/ethnicity, and education. Model 2: adjusted for model 1, smoking, alcohol intake, body-mass index category, and physical activity. Model 3: Model 2 + estimated glomerular filtration rate (Chronic Kidney Disease Epidemiology Collaboration equation), and history of cardiovascular disease, diabetes, hypertension, stroke and chronic obstructive pulmonary disease. Model 4: model 3 + quality of life measures and serum glucose level. Serum glucose level is missing in n=81.

**Supplemental Table 7.** Associations (odds ratio; 95% CI) between quartiles of serum sodium levels and prevalent cognitive impairment (cross-sectional analysis).

| <b>Model</b>      | <b>Quartile 1</b><br>(126-139<br>mmol/L)<br>(n=1083) | <b>Quartile 2</b><br>(140-141<br>mmol/L)<br>(n=1618) | <b>Quartile 3</b><br>(142 mmol/L)<br>(n=931) | <b>Quartile 4</b><br>(143-153<br>mmol/L)<br>(n=1803) | <b>Continuous</b><br>(per 5 mmol/L<br>lower serum<br>sodium) |
|-------------------|------------------------------------------------------|------------------------------------------------------|----------------------------------------------|------------------------------------------------------|--------------------------------------------------------------|
| <b>Unadjusted</b> | 1.39 [1.11, 1.72]                                    | Ref                                                  | 0.98 [0.77, 1.25]                            | 1.08 [0.88, 1.31]                                    | 1.19 [1.02, 1.37]                                            |
| <b>Model 1</b>    | 1.43 [1.13, 1.80]                                    | Ref                                                  | 0.91 [0.70, 1.18]                            | 1.05 [0.85, 1.31]                                    | 1.24 [1.06, 1.45]                                            |
| <b>Model 2</b>    | 1.47 [1.16, 1.87]                                    | Ref                                                  | 0.91 [0.70, 1.19]                            | 1.06 [0.86, 1.32]                                    | 1.25 [1.07, 1.47]                                            |
| <b>Model 3</b>    | 1.44 [1.14, 1.83]                                    | Ref                                                  | 0.92 [0.71, 1.20]                            | 1.07 [0.86, 1.32]                                    | 1.24 [1.05, 1.45]                                            |
| <b>Model 4</b>    | 1.47 [1.15, 1.88]                                    | Ref                                                  | 0.91 [0.70, 1.20]                            | 1.07 [0.86, 1.34]                                    | 1.24 [1.05, 1.46]                                            |

Model 1: adjusted for age, race/ethnicity, and education. Model 2: adjusted for model 1, smoking, alcohol intake, body-mass index category, and physical activity. Model 3: Model 2 + estimated glomerular filtration rate (Chronic Kidney Disease Epidemiology Collaboration equation), and history of cardiovascular disease, diabetes, hypertension, stroke and chronic obstructive pulmonary disease. Model 4: model 3 + quality of life measures and serum glucose level. Serum glucose level is missing in n=141.

**Supplemental Table 8.** Associations (odds ratio; 95% CI) between quartiles of serum sodium levels and cognitive decline (longitudinal analysis).

| Model      | Quartile 1<br>(126-139 mmol/L)<br>(n=687) | Quartile 2<br>(140-141 mmol/L)<br>(n=1076) | Quartile 3<br>(142 mmol/L)<br>(n=626) | Quartile 4<br>(143-153 mmol/L)<br>(n=1222) | Continuous (per<br>5 mmol/L lower<br>serum sodium) |
|------------|-------------------------------------------|--------------------------------------------|---------------------------------------|--------------------------------------------|----------------------------------------------------|
| Unadjusted | 1.33 [1.00, 1.76]                         | Ref                                        | 0.94 [0.68, 1.29]                     | 1.19 [0.93, 1.53]                          | 1.01 [0.83, 1.24]                                  |
| Model 1    | 1.31 [0.98, 1.75]                         | Ref                                        | 0.92 [0.67, 1.27]                     | 1.20 [0.92, 1.55]                          | 0.99 [0.81, 1.22]                                  |
| Model 2    | 1.31 [0.98, 1.76]                         | Ref                                        | 0.92 [0.66, 1.27]                     | 1.20 [0.92, 1.55]                          | 1.00 [0.82, 1.22]                                  |
| Model 3    | 1.31 [0.98, 1.76]                         | Ref                                        | 0.92 [0.67, 1.27]                     | 1.20 [0.93, 1.55]                          | 0.99 [0.81, 1.21]                                  |
| Model 4    | 1.28 [0.95, 1.73]                         | Ref                                        | 0.89 [0.64, 1.24]                     | 1.22 [0.94, 1.59]                          | 0.97 [0.79, 1.19]                                  |

Model 1: adjusted for age, race/ethnicity, and education. Model 2: adjusted for model 1, smoking, alcohol intake, body-mass index category, and physical activity. Model 3: Model 2 + estimated glomerular filtration rate (Chronic Kidney Disease Epidemiology Collaboration equation), and history of cardiovascular disease, diabetes, hypertension, stroke and chronic obstructive pulmonary disease. Model 4: model 3 + quality of life and serum glucose level. Serum glucose level is missing in n=81.

**Supplemental Table 9.** Associations (odds ratio; 95% CI) between categories of serum sodium levels (<136, 136-138, 139-140, 141-142, 143-144, and  $\geq 145$  mmol/L) and prevalent cognitive impairment (cross-sectional analysis)

| Model             | Category 1<br>(<136 mmol/L)<br>(n=100) | Category 2<br>(136-138 mmol/L)<br>(n=528) | Category 3<br>(139-140 mmol/L)<br>(n=1186) | Category 4<br>(141-142 mmol/L)<br>(n=1818) | Category 5<br>(143-144 mmol/L)<br>(n=1275) | Category 6<br>( $\geq 145$ )<br>(n=528) |
|-------------------|----------------------------------------|-------------------------------------------|--------------------------------------------|--------------------------------------------|--------------------------------------------|-----------------------------------------|
| <b>Unadjusted</b> | 2.12 [1.30, 3.44]                      | 1.44 [1.10, 1.88]                         | 1.12 [0.90, 1.39]                          | Ref                                        | 1.05 [0.85, 1.31]                          | 1.21 [0.91, 1.60]                       |
| <b>Model 1</b>    | 2.53 [1.50, 4.25]                      | 1.43 [1.07, 1.90]                         | 1.17 [0.92, 1.43]                          | Ref                                        | 1.06 [0.84, 1.33]                          | 1.23 [0.91, 1.66]                       |
| <b>Model 2</b>    | 2.67 [1.58, 4.51]                      | 1.47 [1.10, 1.96]                         | 1.16 [0.92, 1.47]                          | Ref                                        | 1.06 [0.84, 1.34]                          | 1.23 [0.91, 1.67]                       |
| <b>Model 3</b>    | 2.61 [1.54, 4.43]                      | 1.44 [1.07, 1.92]                         | 1.14 [0.90, 1.45]                          | Ref                                        | 1.06 [0.84, 1.33]                          | 1.23 [0.91, 1.66]                       |
| <b>Model 4</b>    | 2.59 [1.54, 4.44]                      | 1.43 [1.06, 1.93]                         | 1.16 [0.91, 1.48]                          | Ref                                        | 1.06 [0.84, 1.34]                          | 1.24 [0.91, 1.69]                       |

Model 1: adjusted for age, race/ethnicity, and education. Model 2: adjusted for model 1, smoking, alcohol intake, body-mass index category, and physical activity. Model 3: Model 2 + estimated glomerular filtration rate (Chronic Kidney Disease Epidemiology Collaboration equation), and history of cardiovascular disease, diabetes, hypertension, stroke and chronic obstructive pulmonary disease. Model 4: model 3 + quality of life measures and serum glucose level. Serum glucose level is missing in n=141.

**Supplemental Table 10.** Associations (odds ratio; 95% CI) between categories of serum sodium levels (<136, 136-138, 139-140, 141-142, 143-144, and  $\geq 145$  mmol/L) and cognitive decline (longitudinal analysis)

| Model             | Category 1<br>(<136 mmol/L)<br>(n=52) | Category 2<br>(136-138 mmol/L)<br>(n=333) | Category 3<br>(139-140 mmol/L)<br>(n=790) | Category 4<br>(141-142 mmol/L)<br>(n=1214) | Category 5<br>(143-144 mmol/L)<br>(n=855) | Category 6<br>( $\geq 145$ )<br>(n=367) |
|-------------------|---------------------------------------|-------------------------------------------|-------------------------------------------|--------------------------------------------|-------------------------------------------|-----------------------------------------|
| <b>Unadjusted</b> | 0.93 [0.36, 2.37]                     | 1.99 [1.43, 2.78]                         | 1.15 [0.86, 1.53]                         | Ref                                        | 1.27 [0.97, 1.67]                         | 1.37 [0.97, 1.95]                       |
| <b>Model 1</b>    | 0.88 [0.34, 2.30]                     | 1.95 [1.39, 2.75]                         | 1.17 [0.88, 1.57]                         | Ref                                        | 1.26 [0.96, 1.67]                         | 1.47 [1.02, 2.09]                       |
| <b>Model 2</b>    | 0.90 [0.35, 2.36]                     | 1.97 [1.40, 2.78]                         | 1.18 [0.88, 1.58]                         | Ref                                        | 1.28 [0.97, 1.69]                         | 1.45 [1.01, 2.08]                       |
| <b>Model 3</b>    | 0.90 [0.34, 2.38]                     | 1.95 [1.39, 2.75]                         | 1.17 [0.88, 1.57]                         | Ref                                        | 1.28 [0.97, 1.69]                         | 1.45 [1.01, 2.07]                       |
| <b>Model 4</b>    | 0.94 [0.36, 2.47]                     | 1.93 [1.35, 2.74]                         | 1.25 [0.93, 1.68]                         | Ref                                        | 1.34 [1.01, 1.78]                         | 1.53 [1.06, 2.21]                       |

Model 1: adjusted for age, race/ethnicity, and education. Model 2: adjusted for model 1, smoking, alcohol intake, body-mass index category, and physical activity. Model 3: Model 2 + estimated glomerular filtration rate (Chronic Kidney Disease Epidemiology Collaboration equation), and history of cardiovascular disease, diabetes, hypertension, stroke and chronic obstructive pulmonary disease. Model 4: model 3 + quality of life measures and serum glucose level. Serum glucose level is missing in n=141.

**Supplemental Table 11.** Associations (odds ratio; 95% CI) between tertiles of serum sodium levels and prevalent cognitive impairment, excluding individuals with serum sodium level <136 mmol/L (cross-sectional analysis)

| <b>Variable</b>   | <b>Tertile 1</b><br>(136-140<br>mmol/L)<br>(n=1714) | <b>Tertile 2</b><br>(141-142<br>mmol/L)<br>(n=1818) | <b>Tertile 3</b><br>(143-153<br>mmol/L)<br>(n=1803) | <b>Continuous</b><br>(per 5<br>mmol/L<br>lower serum<br>sodium) |
|-------------------|-----------------------------------------------------|-----------------------------------------------------|-----------------------------------------------------|-----------------------------------------------------------------|
| <b>Unadjusted</b> | 1.22 [1.00, 1.47]                                   | Ref                                                 | 1.09 [0.90, 1.33]                                   | 1.09 [0.92, 1.29]                                               |
| <b>Model 1</b>    | 1.25 [1.01, 1.54]                                   | Ref                                                 | 1.11 [0.90, 1.36]                                   | 1.12 [0.93, 1.34]                                               |
| <b>Model 2</b>    | 1.26 [1.02, 1.55]                                   | Ref                                                 | 1.11 [0.90, 1.37]                                   | 1.13 [0.94, 1.35]                                               |
| <b>Model 3</b>    | 1.23 [1.00, 1.52]                                   | Ref                                                 | 1.10 [0.90, 1.36]                                   | 1.11 [0.93, 1.34]                                               |
| <b>Model 4</b>    | 1.25 [1.00, 1.55]                                   | Ref                                                 | 1.11 [0.90, 1.38]                                   | 1.11 [0.92, 1.34]                                               |

3MS score, modified mini-mental examination score. Model 1: adjusted for age, race/ethnicity, and education. Model 2: adjusted for model 1, smoking, alcohol, body-mass index, and physical activity. Model 3: Model 2 + estimated glomerular filtration rate (Chronic Kidney Disease Epidemiology Collaboration equation), and history of cardiovascular disease, diabetes, hypertension, stroke and chronic obstructive pulmonary disease. Model 4: model 3 + quality of life measures and serum glucose level. Serum glucose level is missing in n=102.

**Supplemental Table 12.** Associations (odds ratio; 95% CI) between tertiles of serum sodium levels and cognitive decline, excluding individuals with serum sodium level <136 mmol/L (longitudinal analysis)

| Variable          | Tertile 1<br>(136-140<br>mmol/L)<br>(n=1123) | Tertile 2<br>(141-142<br>mmol/L)<br>(n=1214) | Tertile 3<br>(143-153<br>mmol/L)<br>(n=1222) | Continuous<br>(per 5<br>mmol/L<br>lower serum<br>sodium) |
|-------------------|----------------------------------------------|----------------------------------------------|----------------------------------------------|----------------------------------------------------------|
| <b>Unadjusted</b> | 1.38 [1.08, 1.78]                            | Ref                                          | 1.30 [1.02, 1.67]                            | 1.07 [0.86, 1.32]                                        |
| <b>Model 1</b>    | 1.39 [1.08, 1.80]                            | Ref                                          | 1.32 [1.03, 1.70]                            | 1.05 [0.84, 1.34]                                        |
| <b>Model 2</b>    | 1.41 [1.09, 1.82]                            | Ref                                          | 1.33 [1.03, 1.71]                            | 1.05 [0.84, 1.31]                                        |
| <b>Model 3</b>    | 1.40 [1.08, 1.81]                            | Ref                                          | 1.33 [1.03, 1.71]                            | 1.04 [0.83, 1.30]                                        |
| <b>Model 4</b>    | 1.44 [1.11, 1.88]                            | Ref                                          | 1.40 [1.08, 1.81]                            | 1.02 [0.81, 1.28]                                        |

3MS score, modified mini-mental examination score. Model 1: adjusted for age, race/ethnicity, and education. Model 2: adjusted for model 1, smoking, alcohol, body-mass index, and physical activity. Model 3: Model 2 + estimated glomerular filtration rate (Chronic Kidney Disease Epidemiology Collaboration equation), and history of cardiovascular disease, diabetes, hypertension, stroke and chronic obstructive pulmonary disease. Model 4: model 3 + quality of life measures and serum glucose level. Serum glucose level is missing in n=52.
